# Supplementary material for: Induction and maintenance of a phenotypically heterogeneous lung tissue-resident CD4+ T cell population following BCG immunisation
Source: PubMed Central journal article supplement (PMC6143486; doi:10.1016/j.vaccine.2018.07.035), 2018-09-05
Supplement: mmc1.pdf [file mmc1.pdf]

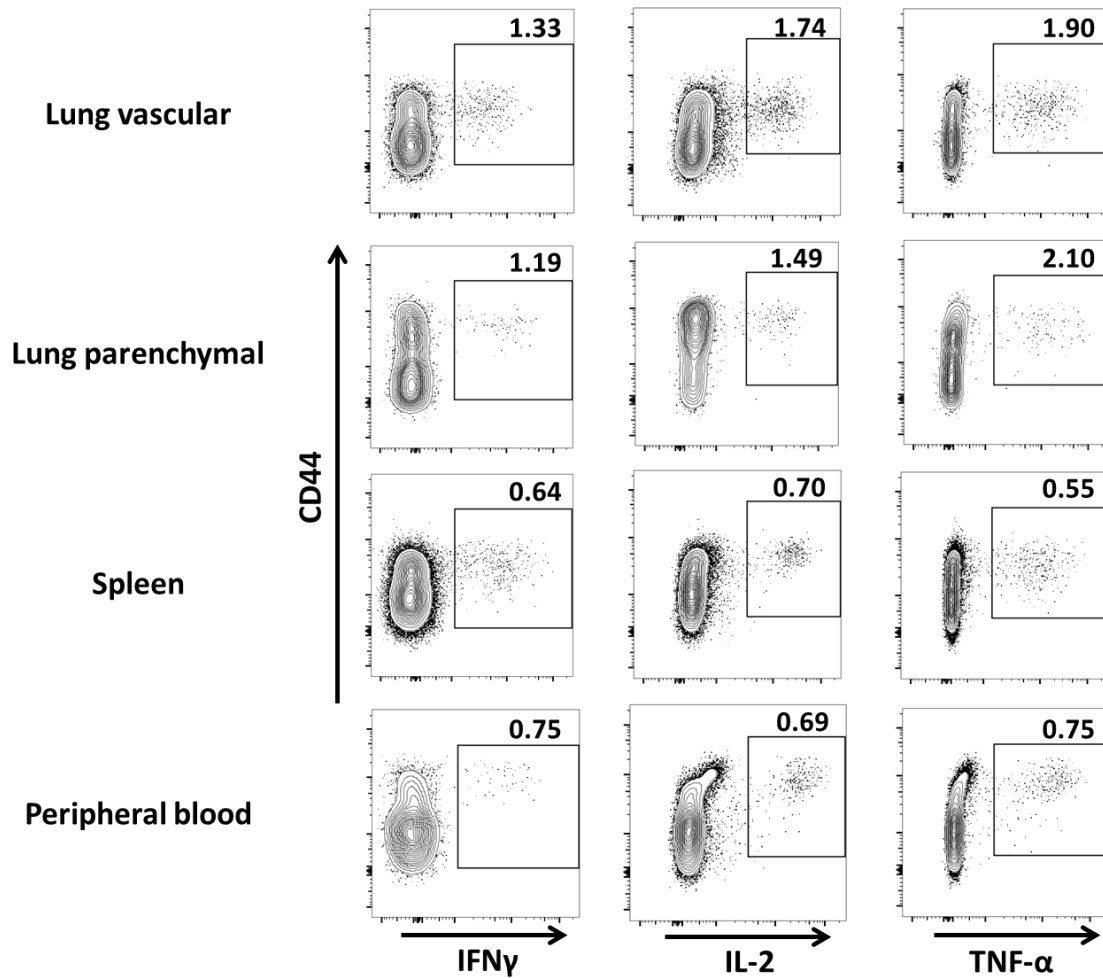

**Supplementary Figure 1 Cytokine production by CD4<sup>+</sup> T cells in different tissue compartments.** Following BCG immunisation, intravascular staining and ICS identified populations of antigen-specific (cytokine<sup>+</sup>) CD4<sup>+</sup> T cells. Representative plots show IFN- $\gamma$ , TNF- $\alpha$  and IL-2 production from CD4<sup>+</sup> T cells in the lung parenchyma, lung vasculature, spleen and peripheral blood of a mouse 5 weeks post-BCG vaccination.

### Week 3

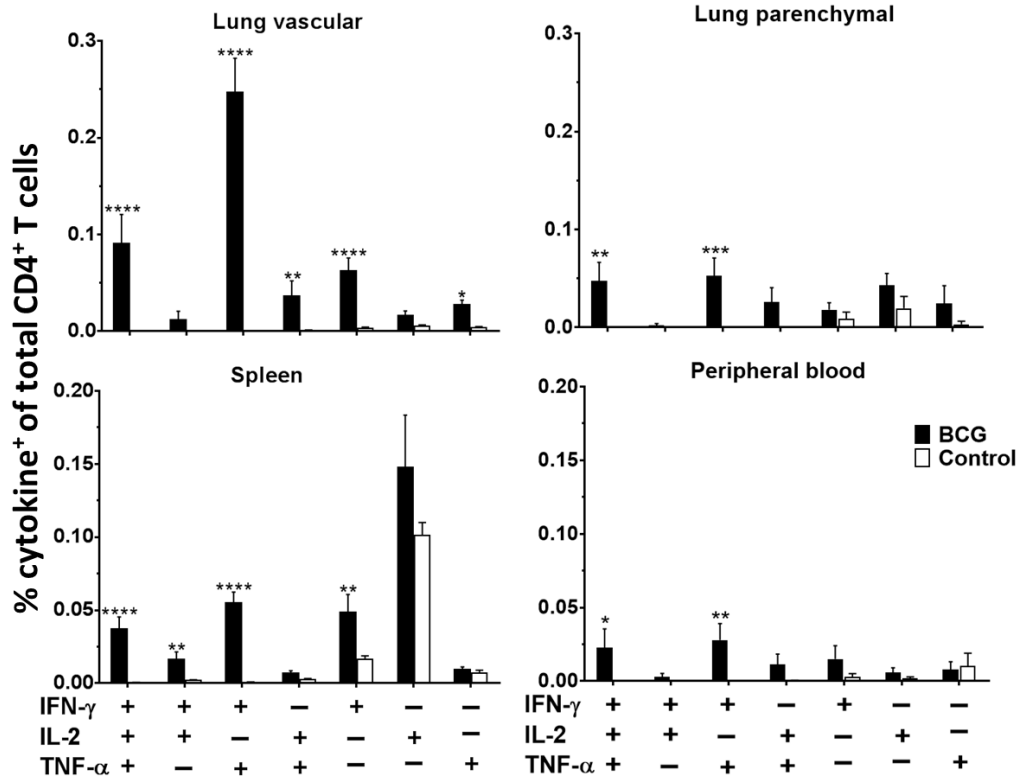

### Week 6

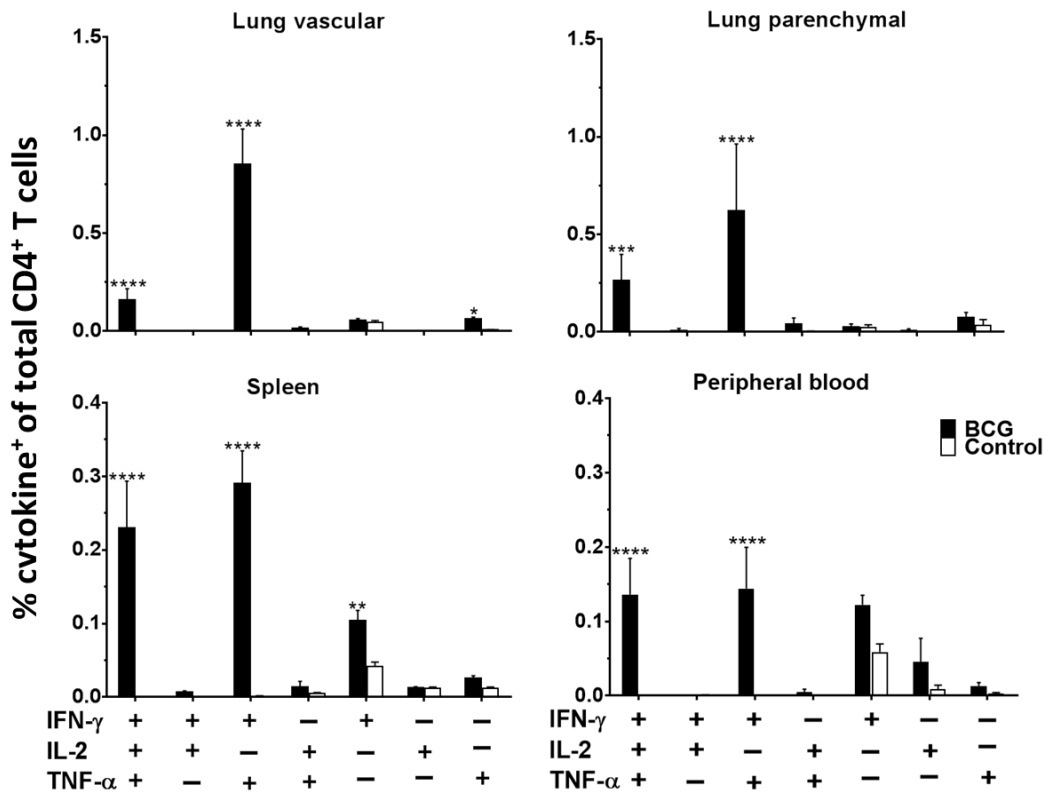

## Week 12

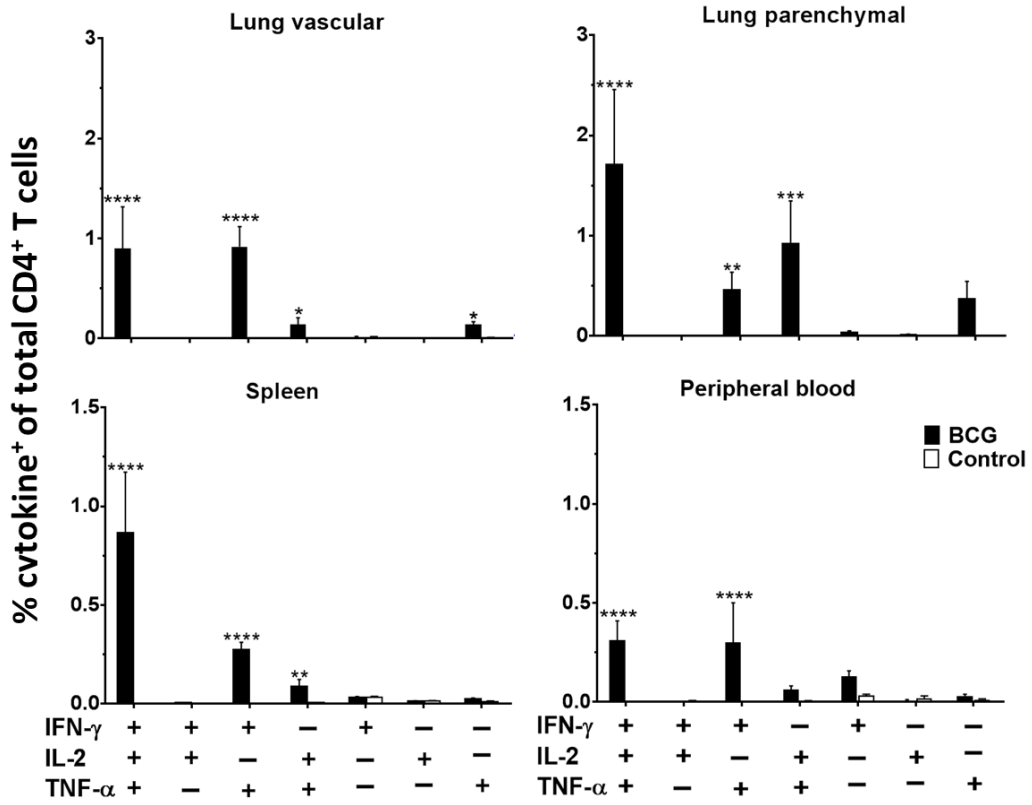

## Week 26

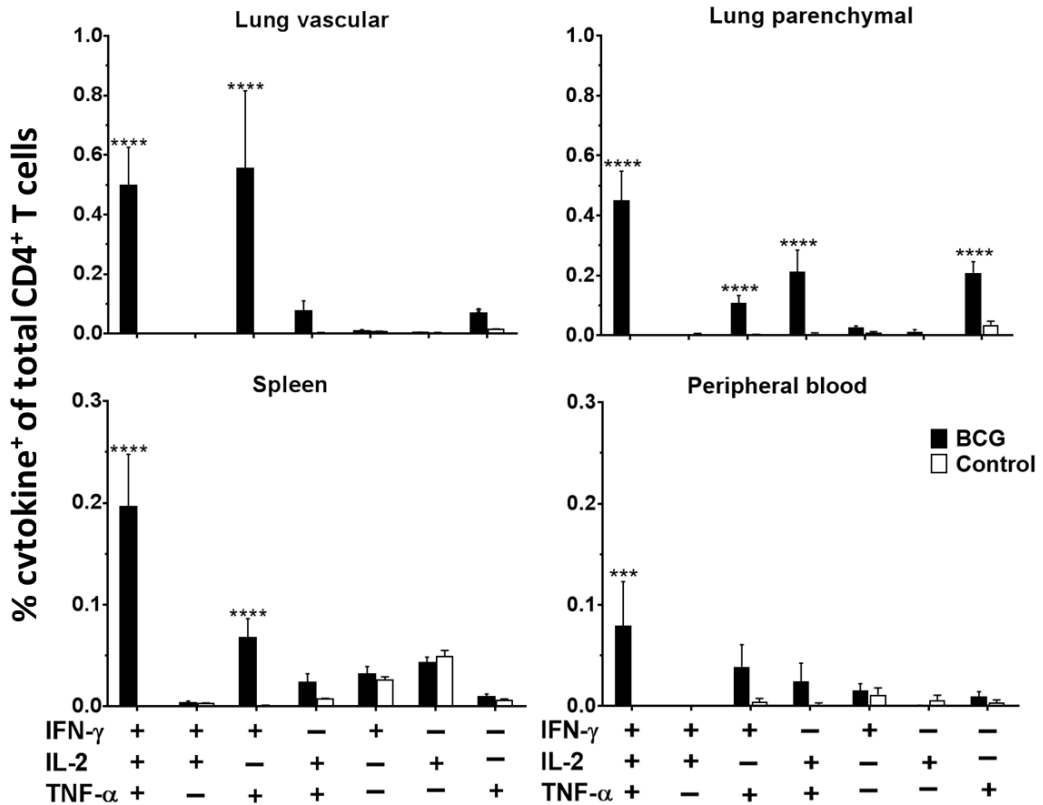

## Week 52

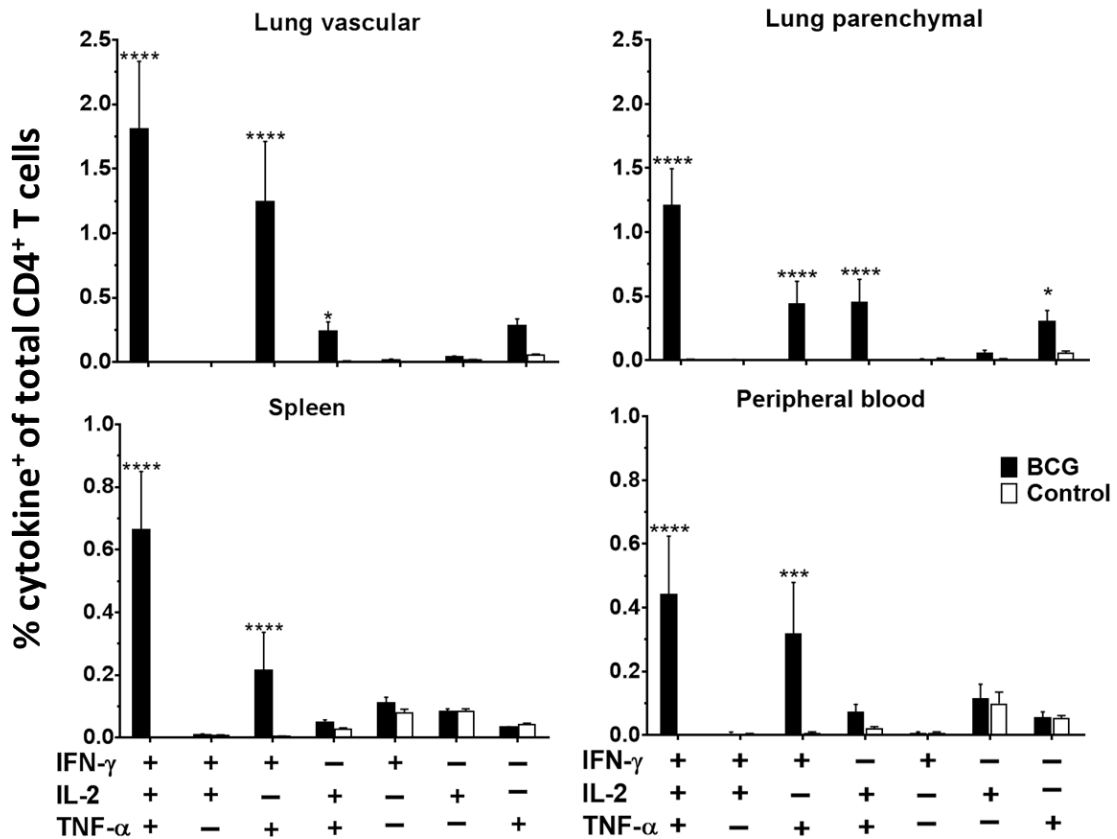

**Supplementary Figure 2 Production of IFN- $\gamma$ , IL-2 and TNF- $\alpha$  by CD4<sup>+</sup> T cells post-BCG vaccination.** Following BCG immunisation, intravascular staining and ICS identified populations of antigen-specific (cytokine<sup>+</sup>) CD4<sup>+</sup> T cells in the lungs, spleen and peripheral blood producing IFN- $\gamma$ , IL-2 or TNF- $\alpha$  alone or in combination. Graphs show frequencies of antigen-specific CD4<sup>+</sup> T cells in all compartments as a % of the total CD4<sup>+</sup> T cells in the same compartment at each time point. For all graphs, bars represent mean  $\pm$  SEM ( $n=6$ ). Two-way ANOVA with Sidak's post-test, comparing BCG and control, \*  $P<0.05$ , \*\*  $P<0.01$ , \*\*\*  $P<0.001$ , \*\*\*\*  $P<0.0001$ .

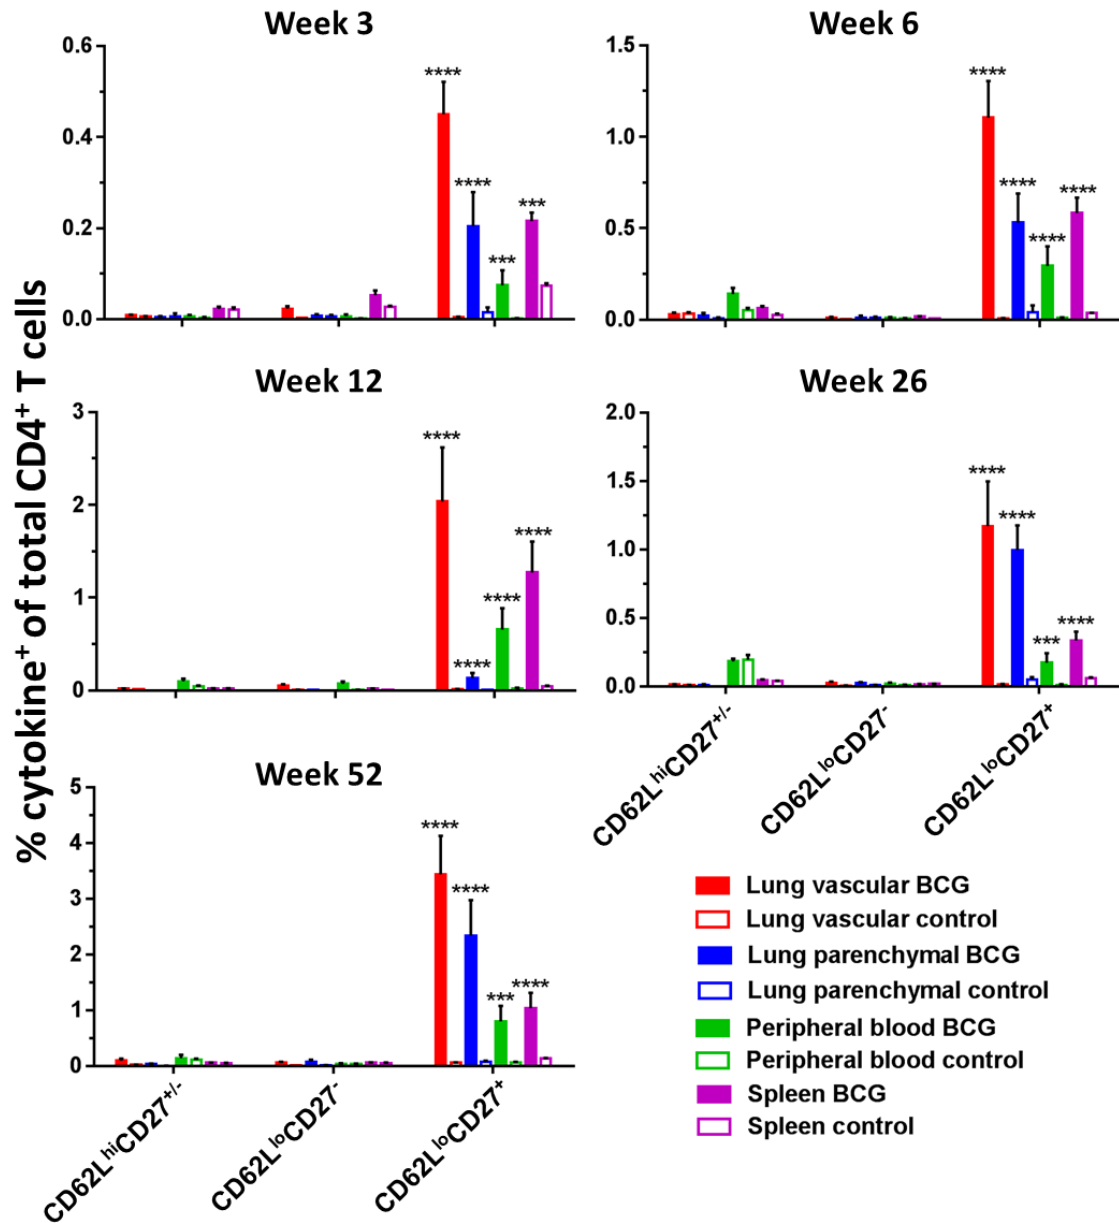

**Supplementary Figure 3 BCG-induced antigen-specific CD4<sup>+</sup> T cells display an effector phenotype at all time points measured post-BCG vaccination.** Following BCG immunisation, intravascular staining and ICS identified populations of antigen-specific (cytokine<sup>+</sup>) CD4<sup>+</sup> T cells. Graphs show frequency of antigen-specific CD4<sup>+</sup> CD44<sup>hi</sup> T cells in all compartments displaying combinations of CD62L and CD27 cell surface markers as a % of total CD4<sup>+</sup> T cells in that compartment. Bars represent mean  $\pm$  SEM ( $n=6$ ). Two-way ANOVA with Sidak's post-test, comparing BCG and control, \*\*\*  $P < 0.001$ , \*\*\*\*  $P < 0.0001$ .

## Week 3

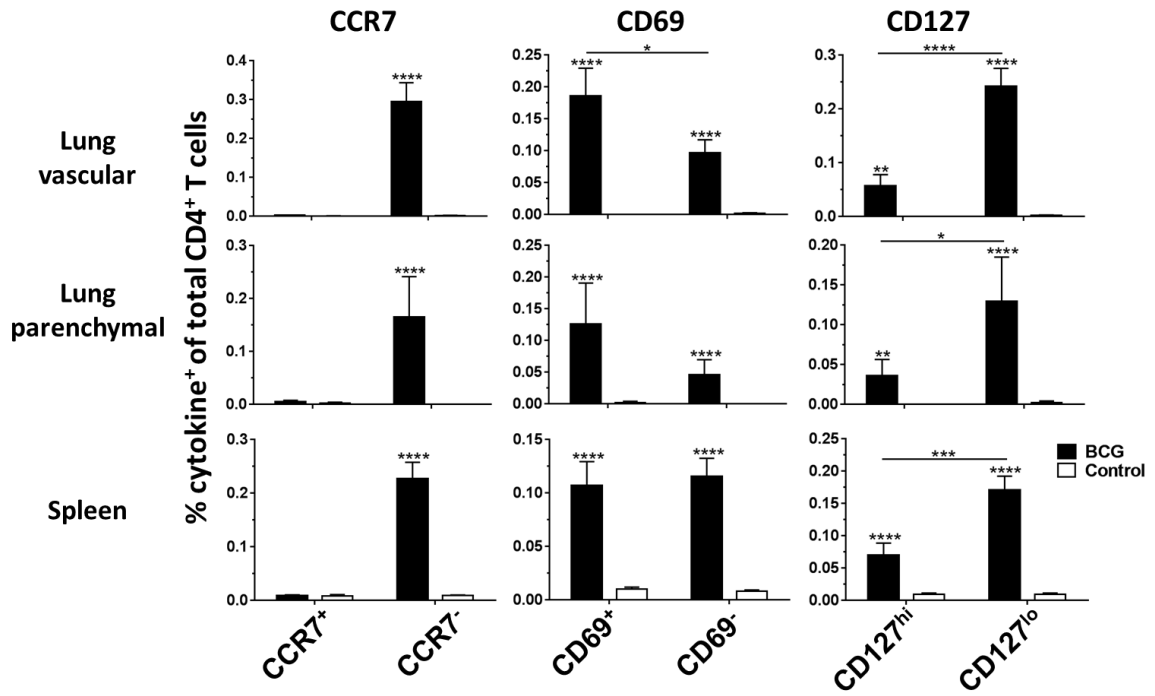

## Week 6

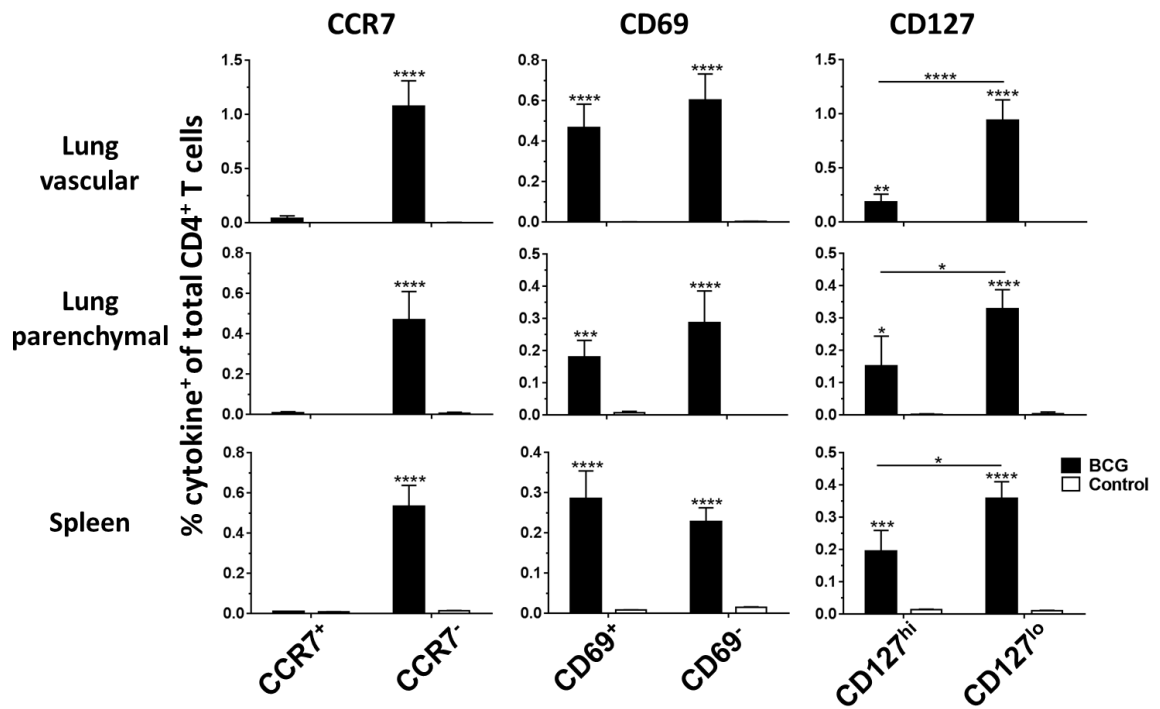

## Week 12

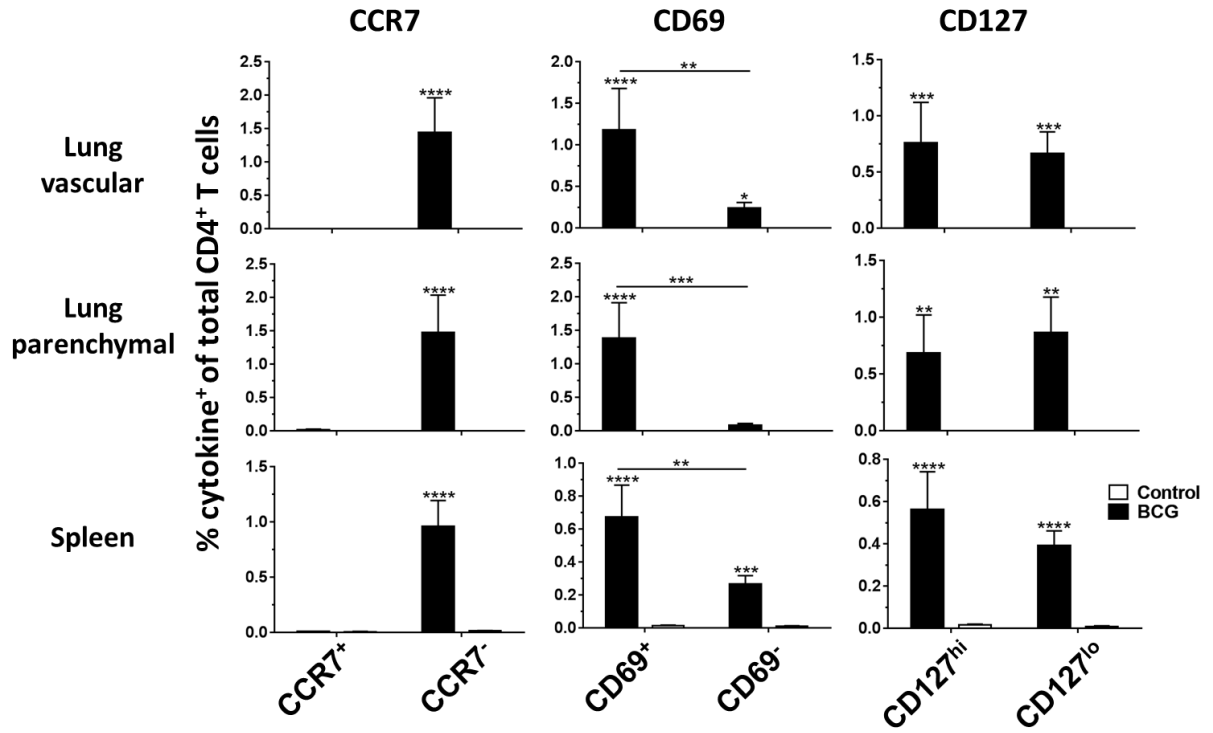

## Week 26

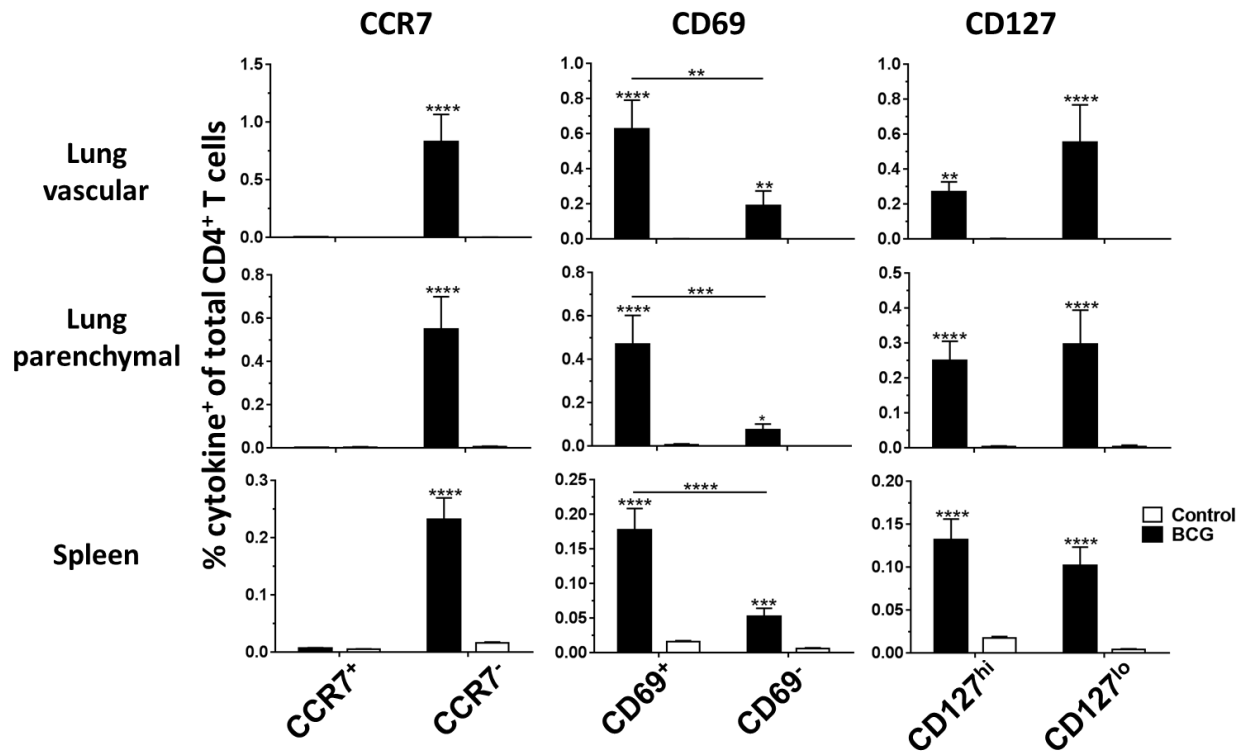

## Week 52

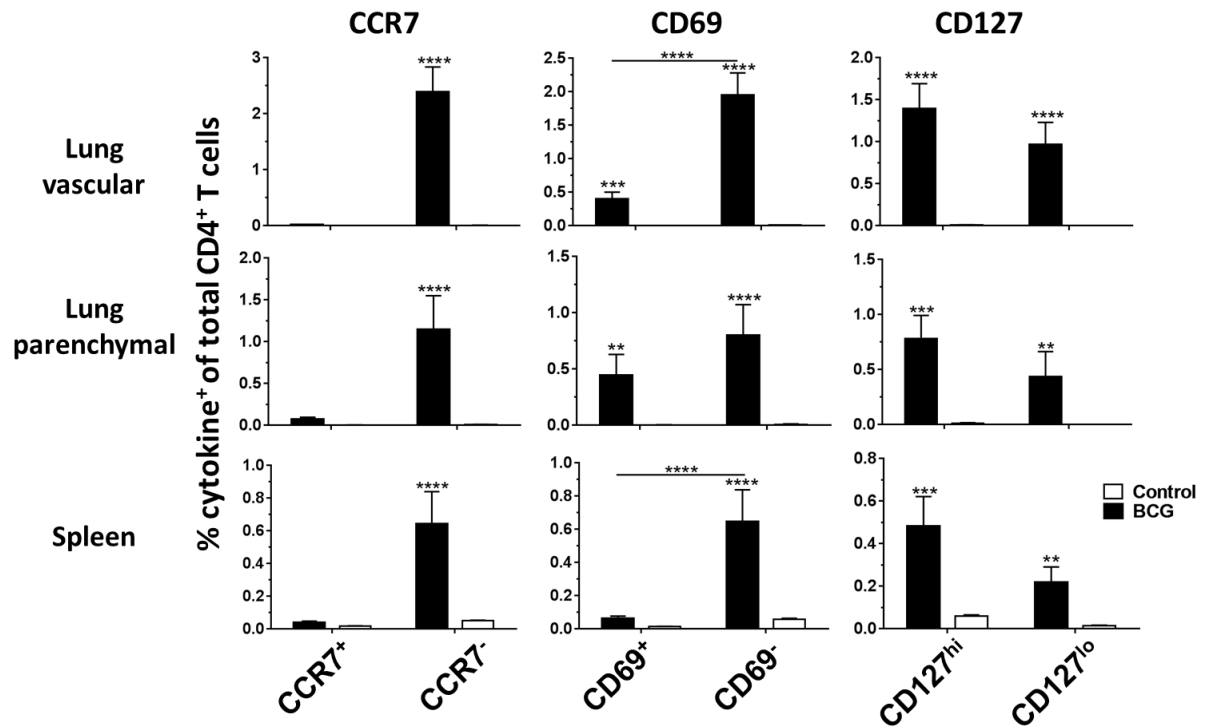

**Supplementary Figure 4 BCG-induced antigen-specific CD4<sup>+</sup> T cells are CCR7<sup>-</sup> but heterogeneous for CD69 and CD127 at all time points measured post-BCG vaccination.**

Following BCG immunisation, intravascular staining and ICS identified populations of antigen-specific (cytokine<sup>+</sup>) CD4<sup>+</sup> T cells. Graphs show frequencies of antigen-specific CD4<sup>+</sup> CD62L<sup>lo</sup> T cells in all compartments displaying CCR7, CD69 and CD127 cell surface markers as a % of total CD4<sup>+</sup> T cells in that compartment. For all graphs, bars represent mean  $\pm$  SEM ( $n=6$ ). Two-way ANOVA with Sidak's post-test, comparing BCG with control and BCG with BCG, \*  $P < 0.05$ , \*\*  $P < 0.01$ , \*\*\*  $P < 0.001$ , \*\*\*\*  $P < 0.0001$ .



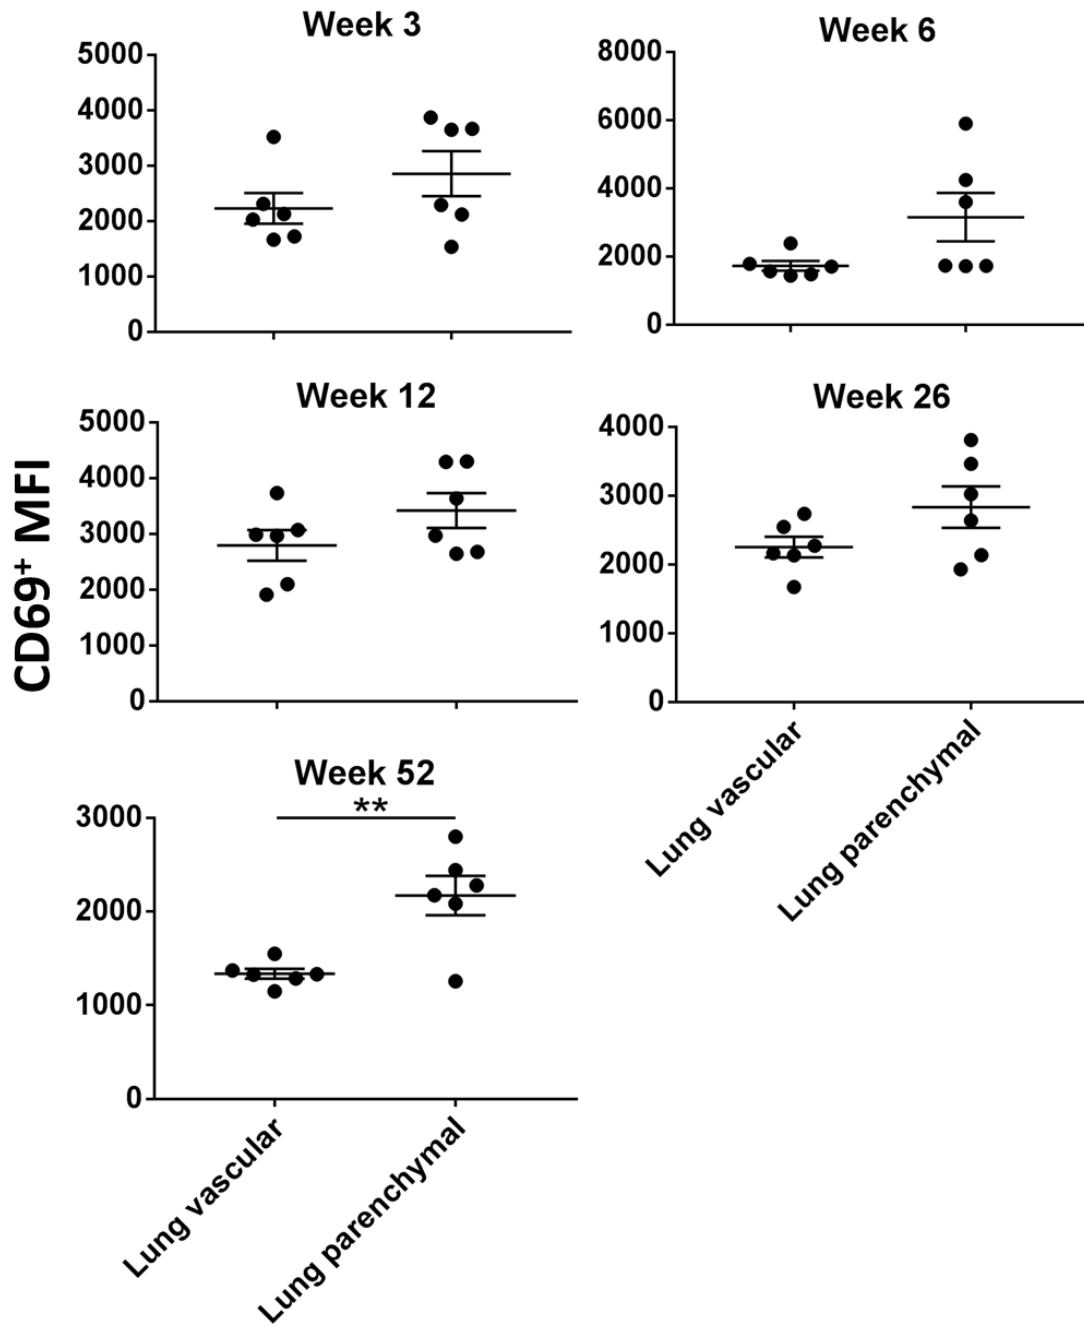

**Supplementary Figure 5 Expression of CD69 on BCG-induced antigen-specific CD4<sup>+</sup> T cells**

**in the lung at all time points measured post-BCG vaccination.** Following BCG immunisation, intravascular staining and ICS identified populations of antigen-specific (cytokine<sup>+</sup>) CD4<sup>+</sup> T cells. Graphs show MFI of cytokine<sup>+</sup> CD69<sup>+</sup> populations in the lung parenchyma and lung vasculature. For all graphs, lines represent mean ± SEM (n=6). Unpaired two-tailed t-tests,

\*\* P<0.01.
